# Supplementary material for: Enhanced Botrytis cinerea Resistance of Arabidopsis Plants Grown in Compost May Be Explained by Increased Expression of Defense-Related Genes, as Revealed by Microarray Analysis
Source: PLoS One. 2013 Feb 6;8(2):e56075. doi: 10.1371/journal.pone.0056075 (PMC3566078; doi:10.1371/journal.pone.0056075)
Supplement: Table S1 — List of significant differentially expressed genes from Arabidopsis plants grown in compost, compared to plants grown in perlite (FC>1). (XLS) [file pone.0056075.s001.xls]

## Sheet: Full1
Table S1. List of significant differentially expressed genes from Arabidopsis plants grown in compost compared to plants grown in perlite (FC>1).
Locus	Description	Fold Change (log2 Compost-log2 Perlite)
AT5G59320	lipid transfer protein 3	4.82254
AT1G19250	flavin-dependent monooxygenase 1	3.92045
AT2G13810	AGD2-like defense response protein 1	3.46344
AT1G15520	pleiotropic drug resistance 12	3.04525
AT1G26390	FAD-binding berberine family protein	2.89012
AT2G45220	plant invertase/pectin methylesterase inhibitor superfamily	2.71292
AT2G43570	chitinase, putative	2.67041
AT1G73010	pyrophosphate-specific phosphatase1	2.56533
AT2G14610	pathogenesis-related gene 1	2.56311
AT3G11340	UDP-dependent glycosyltransferase 76B1	2.43766
AT1G33960	AVRRPT2-induced gene 1	2.28308
AT3G13610	2-oxoglutarate and Fe(ii)-dependent oxygenase superfamily protein	2.28267
AT3G26830	phytoalexin deficient 3	2.18536
AT2G30770	cytochrome p450	2.17802
AT4G08770	peroxidase 37	2.17042
AT2G35980	yellow-leaf-specific gene 9	2.15551
AT1G33950	avirulence induced gene family protein	2.15061
AT1G65690	late embryogenesis abundant hydroxyproline-rich glycoprotein	2.14325
AT4G14630	germin-like protein 9	2.12442
AT2G29470	glutathione S-transferase tau 3	2.00266
AT3G50970	low temperature-induced 30	2.00127
AT5G38900	thioredoxin superfamily protein	1.97431
AT1G44130	eukaryotic aspartyl protease family protein	1.96201
AT3G28510	P-loop containing nucleoside triphosphate hydrolases superfamily protein	1.93698
AT4G21830	methionine sulfoxide reductase b7	1.90857
AT5G03210	DBP-interacting protein 2	1.90035
AT1G66690	S-adenosyl-L-methionine-dependent methyltransferases superfamily protein	1.89562
AT5G13320	AVRPPHB susceptible 3	1.89412
AT2G42540	cold-regulated 15A	1.88905
AT3G22600	bifunctional inhibitor/lipid-transfer protein/seed storage 2S albumin superfamily protein	1.88231
AT1G68620	alpha/beta-hydrolases superfamily protein	1.88147
AT4G25480	dehydration response element B1A	1.87618
AT2G29350	senescence-associated gene 13	1.87548
AT2G26400	acireductone dioxygenase 3	1.86198
AT1G73480	alpha/beta-hydrolases superfamily protein	1.85
AT1G56600	galactinol synthase 2	1.84547
AT1G20190	expansin 11	1.81543
AT1G07430	highly ABA-induced PP2C gene 2	1.81012
AT1G05880	ariadne 12	1.76396
AT2G42530	cold regulated 15B	1.75923
AT5G35880	transposable element gene	1.71814
AT1G57630	toll-interleukin-resistance domain family protein	1.7174
AT5G40010	encodes a mitochondrial atpase involved in seed and silique development.	1.71479
AT4G00700	C2 calcium/lipid-binding plant phosphoribosyltransferase family protein	1.67498
AT3G57260	pathogenesis-related protein 2; beta 1,3-glucanase	1.66078
AT3G22910	ATPase E1-E2 type family protein / haloacid dehalogenase-like hydrolase family protein	1.6567
AT3G01420	alpha-dioxygenase 1	1.63312
AT1G80840	WRKY DNA-binding protein 40	1.59386
AT1G21310	extensin 3	1.58669
AT4G37370	member of CYP81D, cytochrome p450	1.58643
AT1G18710	MYB domain protein 47	1.5845
AT4G35180	lys/his transporter 7	1.55592
AT4G02380	arabidopsis thaliana late embryogenensis abundant like 5,	1.55541
AT4G10500	2-oxoglutarate and Fe(II)-dependent oxygenase superfamily protein	1.55022
AT1G67920	unknown protein	1.54834
AT1G45145	thioredoxin H-type 5	1.54722
AT4G37990	elicitor-activated gene 3	1.54152
AT5G26340	sugar transport protein 13	1.53205
AT2G18660	plant natriuretic peptide a	1.51737
AT1G75040	pathogenesis-related gene 5; thaumatin-like protein	1.49582
AT3G17790	purple acid phosphatase 17	1.48866
AT4G11890	protein kinase superfamily protein	1.48849
AT2G24850	tyrosine aminotransferase 3	1.48826
AT4G16146	camp-regulated phosphoprotein 19-related protein	1.48441
AT3G02040	glycerophosphodiester phosphodiesterase 1	1.46444
AT1G73805	SAR deficient 1	1.45812
AT4G29740	cytokinin oxidase 4	1.43954
AT5G52760	copper transport protein family	1.42954
AT1G51890	leucine-rich repeat protein kinase family protein	1.40525
AT1G02930	glutathione S-transferase 1	1.40179
AT4G26270	phosphofructokinase 3	1.39511
AT1G32940	SBT3.5	1.38794
AT3G57240	beta-1,3-glucanase 3	1.3831
AT3G47340	glutamine-dependent asparagine synthase 1	1.38285
AT4G04500	cysteine-rich receptor-like protein kinase 37	1.37565
AT5G36910	thionin 2.2	1.36453
AT4G14690	early light-inducible protein 2	1.35824
AT1G36550	transposable element gene	1.35253
AT5G66400	responsive to ABA 18	1.34229
AT4G39030	enhanced disease susceptibility 5	1.32831
AT4G23150	cysteine-rich receptor-like protein kinase 7	1.32737
AT5G02780	glutathione transferase lambda 1	1.30433
AT1G17745	3-phosphoglycerate dehydrogenase	1.29904
AT2G43000	NAC domain containing protein 42	1.29887
AT5G52310	cold regulated 78	1.29296
AT3G30510	transposable element gene	1.28559
AT5G18470	curculin-like (mannose-binding) lectin family protein	1.26988
AT2G11810	monogalactosyl diacylglycerol synthase 3	1.26852
AT4G01390	TRAF-like family protein	1.26301
AT1G51090	heavy metal transport/detoxification superfamily protein	1.23987
AT1G17170	glutathione S-transferase tau 24	1.23648
AT3G44860	farnesoic acid carboxyl-o-methyltransferase	1.2198
AT5G26920	CAM-binding protein 60 G-like	1.21609
AT4G04490	cysteine-rich receptor-like protein kinase 36	1.21254
AT4G23140	cysteine-rich receptor-like protein kinase 6	1.19531
AT1G02220	NAC domain containing protein 3	1.19432
AT5G48400	glutamate receptor 1.2	1.18846
AT4G36990	heat shock factor 4	1.17789
AT2G04430	nudix hydrolase homolog 5	1.17787
AT2G03080	transposable element gene	1.16301
AT2G38240	2-oxoglutarate and Fe(II)-dependent oxygenase superfamily protein	1.15822
AT2G10640	transposable element gene	1.15779
AT3G30396	transposable element gene	1.15503
AT5G10695	unknown protein	1.15342
AT1G32350	alternative oxidase 1D	1.15137
AT1G30250	unknown protein	1.14839
AT1G67970	heat shock transcription factor A8	1.14468
AT3G60140	dark inducible 2	1.14384
AT4G23210	cysteine-rich receptor-like kinase 13	1.12751
AT5G17760	P-loop containing nucleoside triphosphate hydrolases superfamily protein	1.12223
AT5G59670	leucine-rich repeat protein kinase family protein	1.12196
AT5G47220	ethylene response factor- 2	1.11647
AT2G12300	transposable element gene	1.10781
AT5G42380	calmodulin like 37	1.10435
AT4G13180	NAD(P)-binding rossmann-fold superfamily protein	1.10128
AT2G18690	unknown protein	1.09919
AT4G30650	low temperature and salt responsive protein family	1.09512
AT3G48640	unknown protein	1.09293
AT1G74590	glutathione S-transferase tau 10	1.09284
AT5G16980	zinc-binding dehydrogenase family protein	1.0838
AT1G32960	SBT3.3	1.08369
AT3G51660	tautomerase/mif superfamily protein	1.08331
AT1G29395	cold regulated 314 thylakoid membrane 1	1.07681
AT5G32430	transposable element gene	1.06772
AT1G02450	NIM1-interacting 1	1.06597
AT2G22500	dicarboxylate carrier 1	1.0651
AT1G33030	o-methyltransferase family protein	1.06184
AT3G62550	adenine nucleotide alpha hydrolases-like superfamily protein	1.05884
AT4G23600	coronatine induced	1.0582
AT5G18600	thioredoxin superfamily protein	1.05391
AT5G52640	heat shock protein 90.1	1.05389
AT4G28490	receptor-like protein kinase 5	1.05229
AT1G43910	P-loop containing nucleoside triphosphate hydrolases superfamily protein	1.0426
AT1G78440	gibberellin 2-oxidase 1	1.04145
AT1G13990	unknown protein	1.03809
AT1G52000	mannose-binding lectin superfamily protein	1.03763
AT5G22530	unknown protein	1.03607
AT3G50930	cytochrome BC1 synthesis	1.03222
AT4G25000	alpha-amylase-like	1.02813
AT3G47480	calcium-binding ef-hand family protein	1.02753
AT1G09350	galactinol synthase 3	1.02693
AT3G13950	unknown protein	1.02248
AT5G22570	WRKY DNA-binding protein 38	1.02183
AT4G23220	cysteine-rich receptor-like protein kinase 14	1.01856
AT1G13470	protein of unknown function (duf1262)	1.01344
AT5G20150	SPX domain gene 1	1.01317
AT3G22840	early light-inducible protein 1	1.01207
AT5G61820	unknown protein	1.0102
AT3G47780	ATP-binding cassette A7	1.00953
AT1G01480	1-amino-cyclopropane-1-carboxylate synthase 2	1.00651
AT5G54190	protochlorophyllide oxidoreductase A	1.00571
AT2G32680	receptor like protein 23	1.00473
AT1G13340	regulator of VPS4 activity in the MVB pathway protein	1.00472
AT2G30550	encodes a lipase that hydrolyzes phosphatidylcholine, glycolipids and triacylglycerols	1.00162
AT2G46680	homeobox 7	1.00053
AT3G61060	phloem protein 2-A13	-1.00501
AT5G59080	unknown protein	-1.02313
AT4G37610	BTB and TAZ domain protein 5	-1.03553
AT5G42800	dihydroflavonol 4-reductase	-1.03988
AT5G16570	glutamine synthetase 1;4	-1.07625
AT4G19420	pectinacetylesterase family protein	-1.09284
AT1G04770	tetratricopeptide repeat (tpr)-like superfamily protein	-1.10307
AT3G03910	glutamate dehydrogenase 3	-1.11871
AT5G22920	CHY-type/CTCHY-type/ring-type zinc finger protein	-1.12366
AT5G28770	arabidopsis thaliana basic leucine zipper 63	-1.14903
AT5G67520	adenosine-5'-phosphosulfate kinase 4	-1.17971
AT3G56200	encodes a putative amino acid transporter.	-1.20046
AT4G21870	HSP20-like chaperones superfamily protein	-1.20284
AT3G16150	asparaginase B1	-1.22333
AT1G68190	B-box zinc finger family protein	-1.24015
AT5G01600	ferretin 1	-1.24254
AT2G04032	zinc transporter 7 precursor	-1.4366
AT4G27450	aluminium induced protein with ygl and lrdr motifs	-1.51289
AT4G25100	Fe superoxide dismutase 1	-1.78696
AT5G26220	CHAC-like family protein	-1.80634
AT2G33850	unknown protein	-1.85398
AT5G20250	dark inducible 10	-2.06052
AT5G48850	sulphur deficiency-induced 1	-2.1838
